# Supplementary material for: Influence of the polar light cycle on seasonal dynamics of an Antarctic lake microbial community
Source: Microbiome. 2020 Aug 9;8:116. doi: 10.1186/s40168-020-00889-8 (PMC7416419; doi:10.1186/s40168-020-00889-8)
Supplement: Supplementary file 4 — Additional file 3: Ace Lake video. Movie and text description. [file 40168_2020_889_MOESM3_ESM.zip]

Archive with 2 entries (2 files):
- 40168_2020_889_MOESM3_ESM.pdf
- Ace Lake video.mp4
